# Supplementary material for: Prepartum Magnesium Butyrate Supplementation of Dairy Cows Improves Colostrum Yield, Calving Ease, Fertility, Early Lactation Performance and Neonatal Vitality
Source: MDPI journal article supplement (doi:10.3390/ani13081319), 2023-04-12
Supplement: s1 [file s1]

#### Supplementary Table S4

Estimated average weekly milk yield in magnesium butyrate (MgB) and Control groups and standard error of mean (Linear mixed-effects model).

|                 | Weeks   |       |       |       |       |       |       |       |       |       | SEM  | Group | <i>P</i> -values |              |
|-----------------|---------|-------|-------|-------|-------|-------|-------|-------|-------|-------|------|-------|------------------|--------------|
|                 | 1       | 2     | 3     | 4     | 5     | 6     | 7     | 8     | 9     | 10    |      |       | Week             | Group × Week |
| Control         | 27.39   | 34.79 | 35.67 | 38.61 | 38.33 | 37.78 | 38.26 | 34.98 | 36.29 | 36.24 | 0.94 | 0.181 | <0.0001          | 0.0005       |
| MgB             | 32.07   | 36.55 | 37.51 | 39.13 | 37.88 | 37.74 | 38.15 | 35.76 | 36.32 | 36.43 |      |       |                  |              |
| <i>P</i> -value | <0.0001 | 0.057 | 0.048 | 0.581 | 0.636 | 0.962 | 0.911 | 0.418 | 0.975 | 0.841 |      |       |                  |              |

#### Supplementary Table S5

Estimated marginal means of BCS in magnesium butyrate (MgB) and Control groups and standard error of the mean (Linear mixed effects model).

|                 | Weeks |       |       |       |       |       |       |       |       |        |       |       |       |       | <i>P</i> -values |       |         |                 |
|-----------------|-------|-------|-------|-------|-------|-------|-------|-------|-------|--------|-------|-------|-------|-------|------------------|-------|---------|-----------------|
|                 | -3    | -2    | -1    | 0     | 1     | 2     | 3     | 4     | 5     | 6      | 7     | 8     | 9     | 10    | SEM              | Group | Week    | Group<br>× Week |
| Control         | 3.61  | 3.60  | 3.62  | 3.61  | 3.57  | 3.53  | 3.49  | 3.45  | 3.39  | 3.33   | 3.29  | 3.22  | 3.18  | 3.13  | 0.030            | 0.034 | <0.0001 | <0.00001        |
| MgB             | 3.62  | 3.60  | 3.63  | 3.62  | 3.62  | 3.59  | 3.55  | 3.52  | 3.47  | 3.43   | 3.38  | 3.30  | 3.25  | 3.18  |                  |       |         |                 |
| <i>P</i> -value | 0.828 | 0.975 | 0.729 | 0.542 | 0.111 | 0.078 | 0.047 | 0.020 | 0.005 | <0.001 | 0.003 | 0.011 | 0.041 | 0.101 |                  |       |         |                 |
