# Supplementary material for: Prepartum Magnesium Butyrate Supplementation of Dairy Cows Improves Colostrum Yield, Calving Ease, Fertility, Early Lactation Performance and Neonatal Vitality
Source: MDPI journal article supplement (doi:10.3390/ani13081319), 2023-04-12
Supplement: s1 [file s1]

**Supplementary Table S1**

Average temperature humidity index (THI) values and the number of animals enrolled in the study during the study period in the barns of magnesium butyrate (MgB) and Control groups.

| Month    | Average THI |     | No. of animals enrolled |     |
|----------|-------------|-----|-------------------------|-----|
|          | Control     | MgB | Control                 | MgB |
| February | 42          | 40  | 10                      | 11  |
| March    | 47          | 47  | 21                      | 24  |
| April    | 50          | 50  | 24                      | 25  |
| May      | 58          | 58  | 24                      | 26  |
| June     | 70          | 71  | 14                      | 12  |
| July     | 72          | 72  | 15                      | 14  |

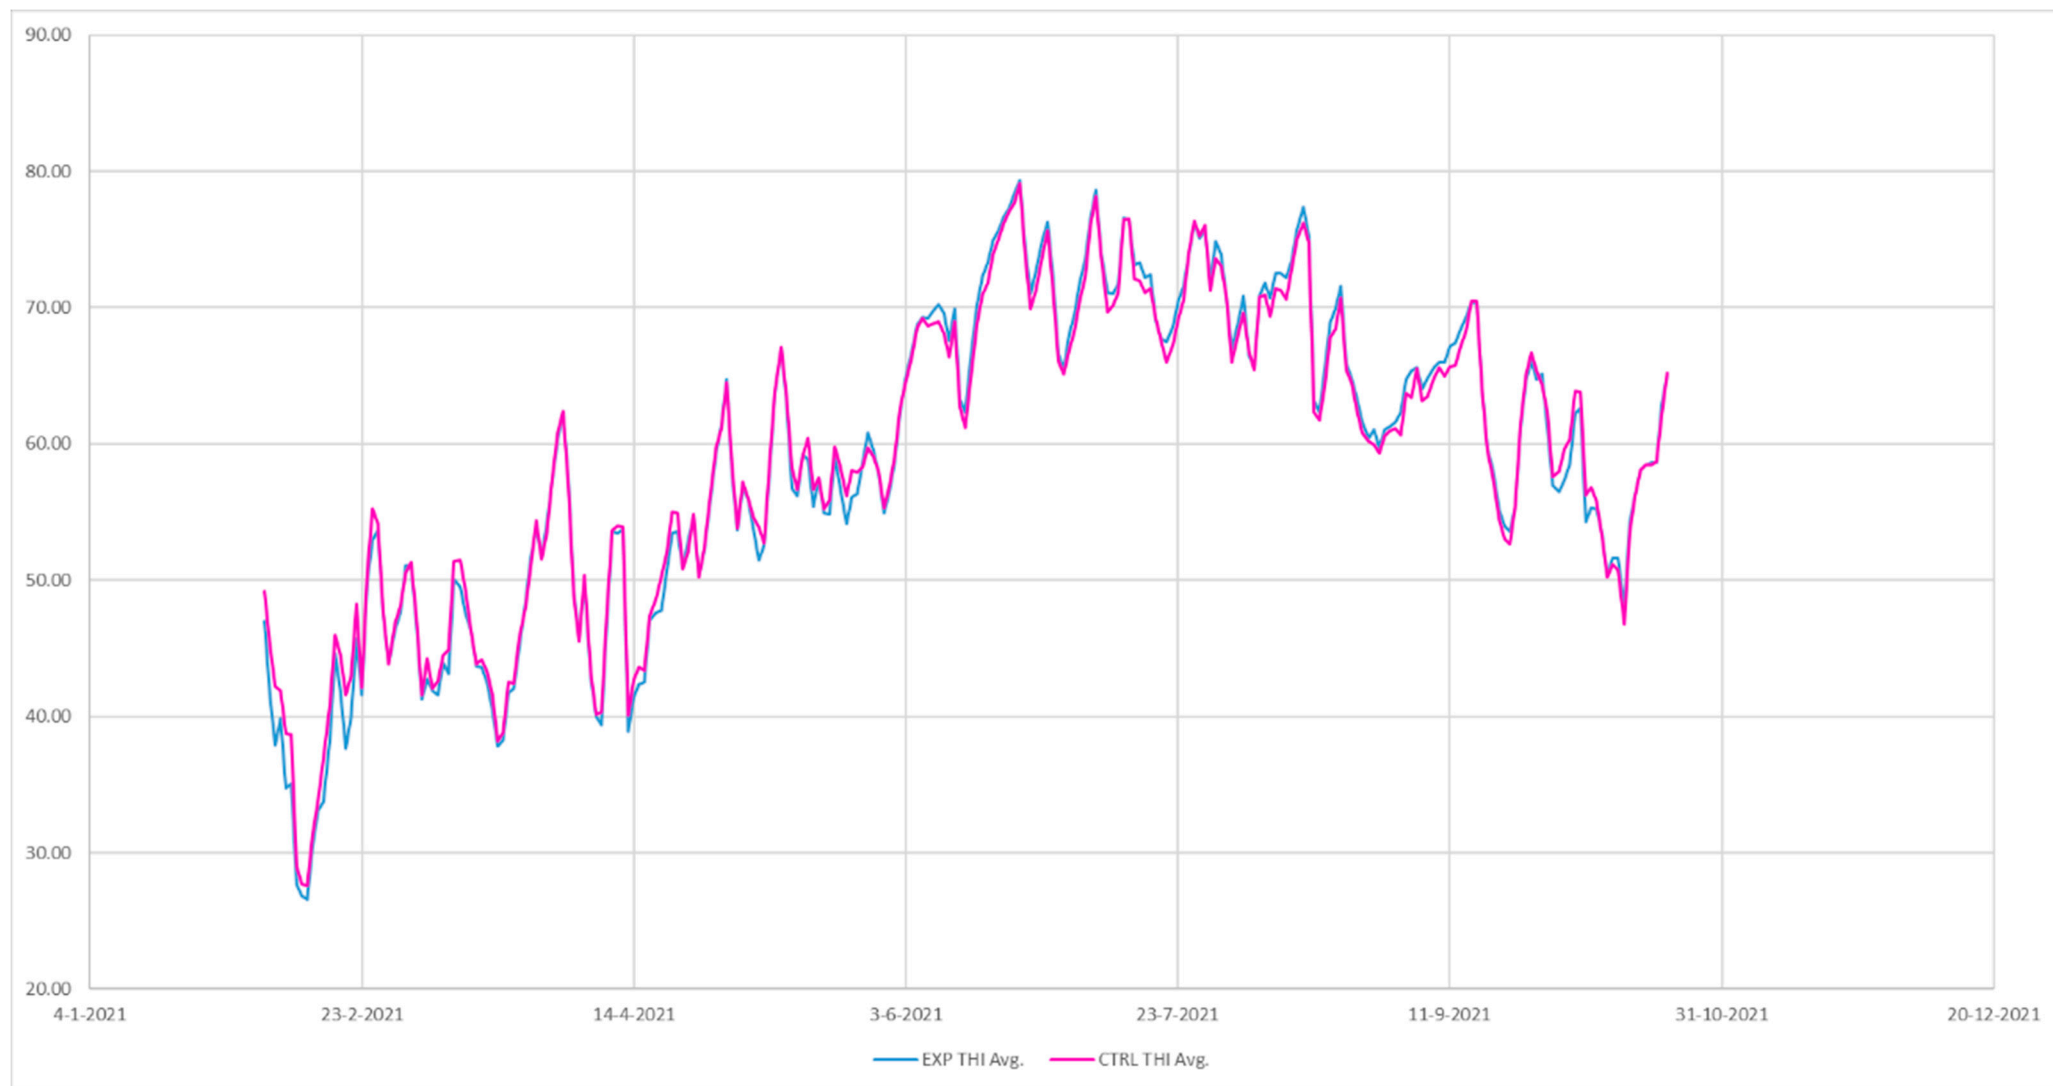

**Supplementary Figure S1.** Changes in average daily THI values during the study period in the barns of magnesium butyrate (EXP) and Control (CTRL) groups.

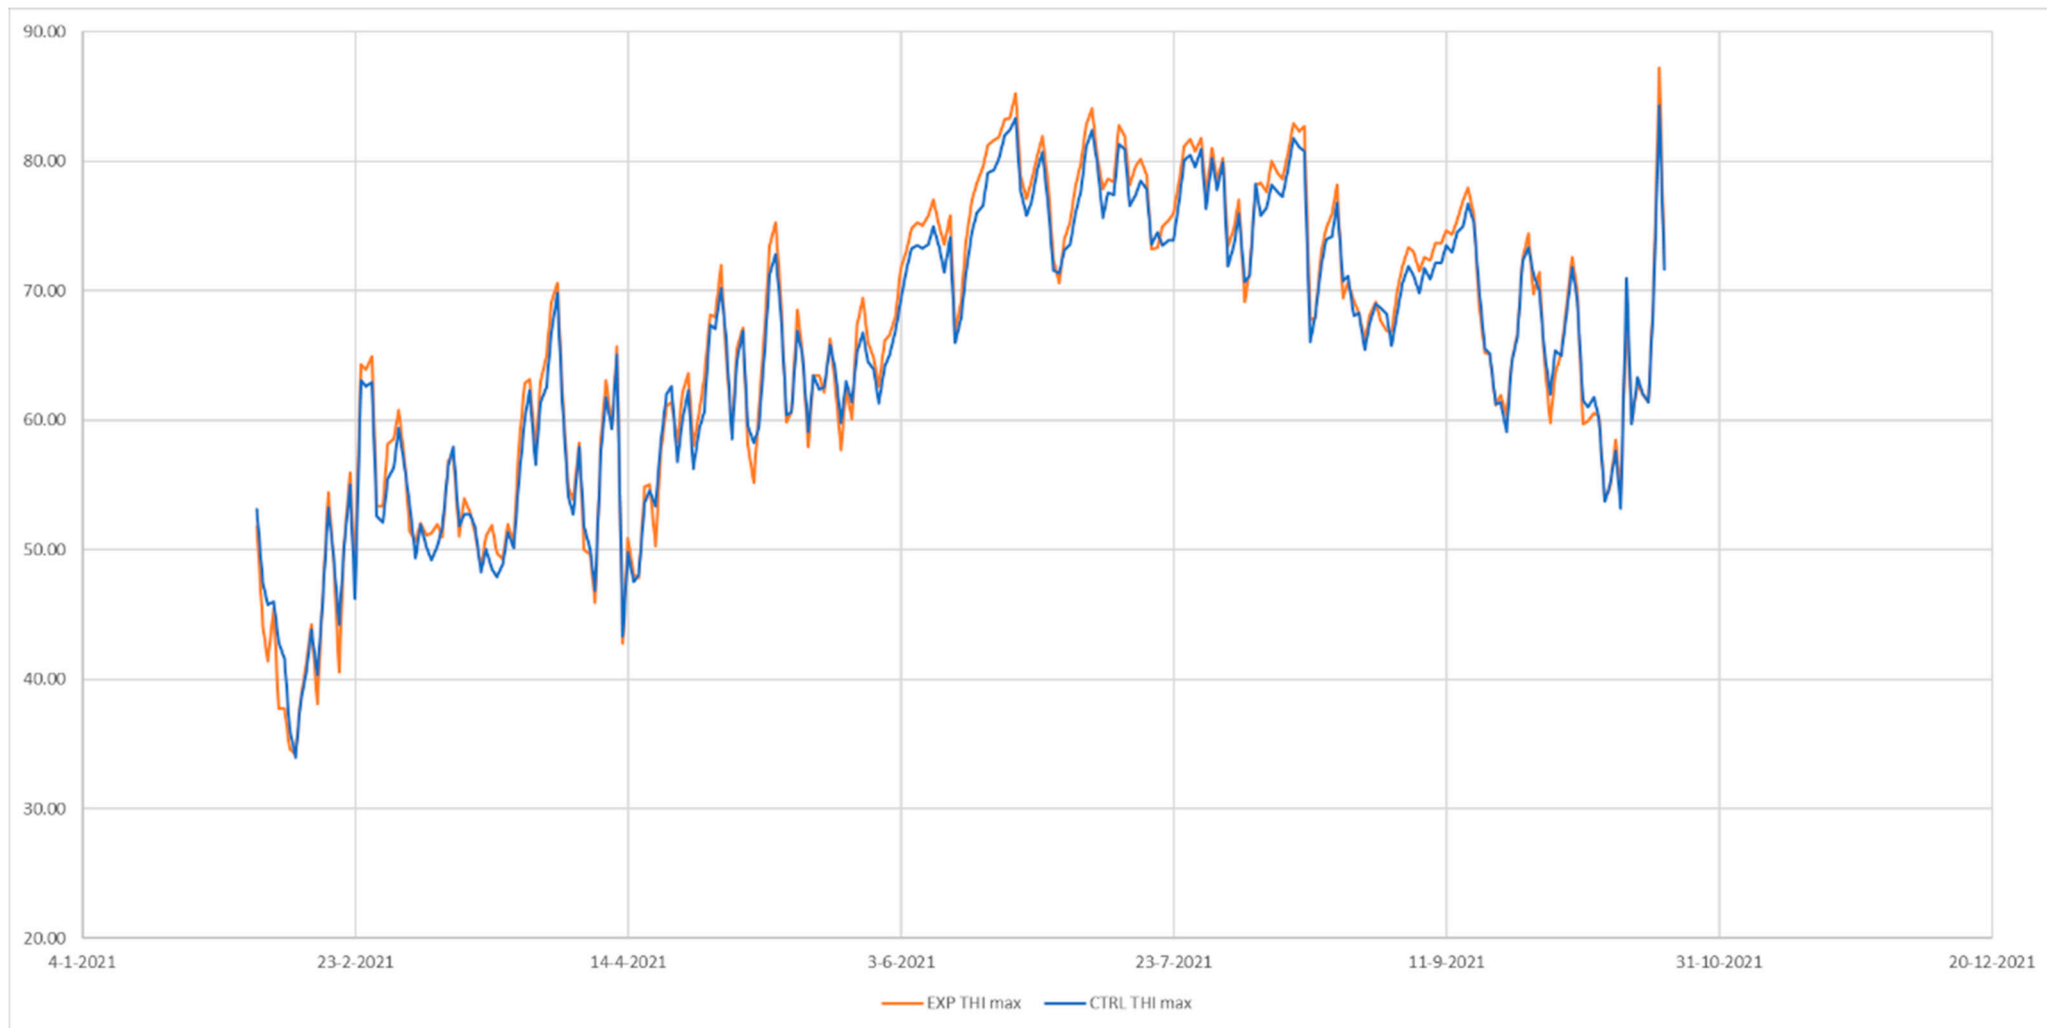

**Supplementary Figure S2.** Changes in maximal daily THI values during the study period in the barns of magnesium butyrate (EXP) and Control (CTRL) groups.
