# Supplementary material for: Prepartum Magnesium Butyrate Supplementation of Dairy Cows Improves Colostrum Yield, Calving Ease, Fertility, Early Lactation Performance and Neonatal Vitality
Source: MDPI journal article supplement (doi:10.3390/ani13081319), 2023-04-12
Supplement: s1 [file s1]

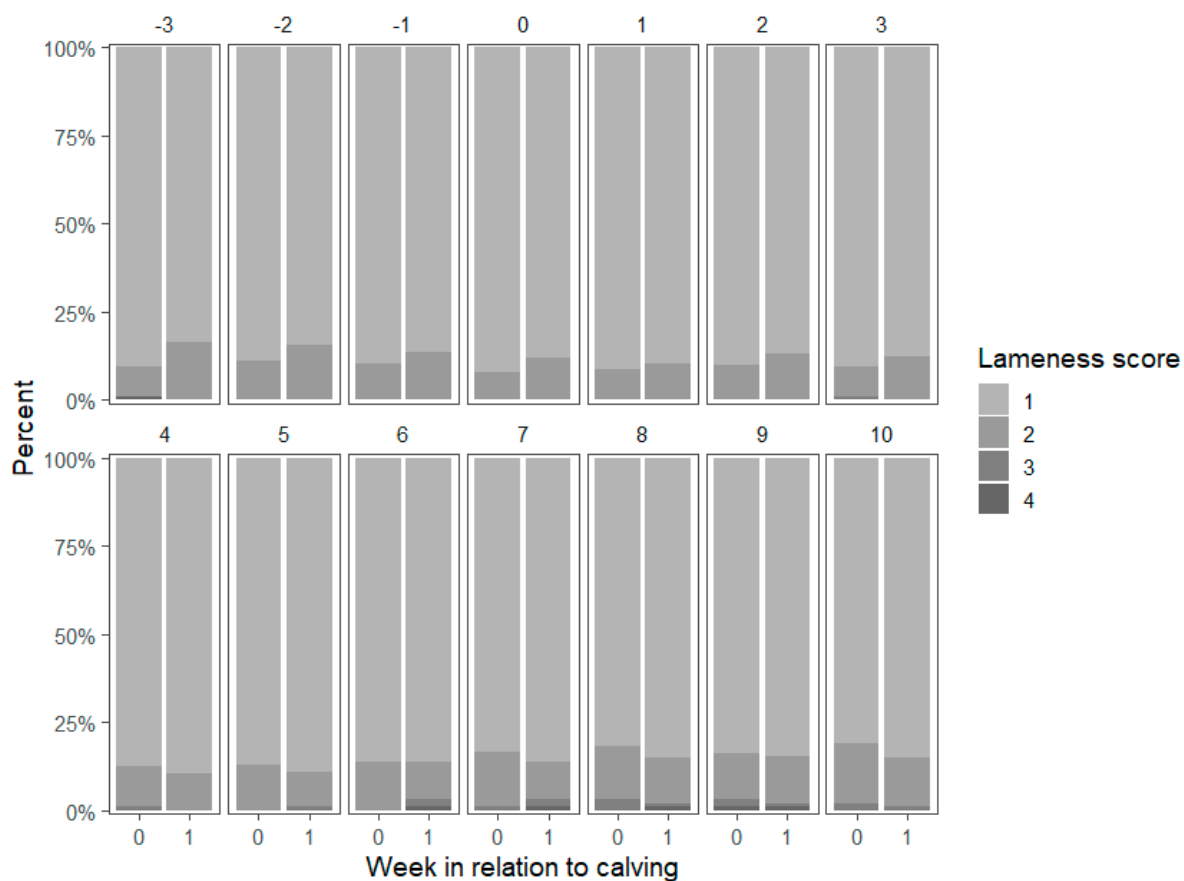

**Supplementary Figure S3.** Lameness score. Trial groups are indicated as: 0=Control; 1=Magnesium Butyrate.

**Supplementary Table S3**

Results of statistical test regarding difference in the distribution of lameness categories between magnesium butyrate and Control groups during the experiment.

| Week             | -3    | -2    | -1    | 0     | 1     | 2     | 3     | 4     | 5     | 6     | 7     | 8     | 9 | 10    |
|------------------|-------|-------|-------|-------|-------|-------|-------|-------|-------|-------|-------|-------|---|-------|
| <i>P</i> -value* | 0.821 | 0.821 | 0.821 | 0.821 | 0.892 | 0.821 | 0.821 | 0.892 | 0.821 | 0.821 | 0.821 | 0.821 | 1 | 0.845 |

\**P*-values were adjusted for multiple comparisons, by controlling for false discovery rate.
