# Supplementary material for: Prepartum Magnesium Butyrate Supplementation of Dairy Cows Improves Colostrum Yield, Calving Ease, Fertility, Early Lactation Performance and Neonatal Vitality
Source: MDPI journal article supplement (doi:10.3390/ani13081319), 2023-04-12
Supplement: s1 [file s1]

### Supplementary Table S2

Number of cows enrolled into the study according to parity and experimental group (Control and Magnesium butyrate), and the percentage of cows for each parity within a group, are indicated.

| Parity | No. of cows (% of group) |                    |
|--------|--------------------------|--------------------|
|        | Control                  | Magnesium butyrate |
| 2      | 45 (40.2)                | 41 (38.3)          |
| 3      | 39 (34.8)                | 50 (46.7)          |
| 4      | 12 (10.7)                | 11 (10.3)          |
| 5      | 6 (5.4)                  | 2 (1.9)            |
| 6      | 4 (3.6)                  | 3 (2.8)            |
| 7      | 6 (5.4)                  | 0 (0)              |
