# Supplementary material for: Prepartum Magnesium Butyrate Supplementation of Dairy Cows Improves Colostrum Yield, Calving Ease, Fertility, Early Lactation Performance and Neonatal Vitality
Source: Animals (Basel). 2023 Apr 12;13(8):1319. doi: 10.3390/ani13081319 (PMC10135157; doi:10.3390/ani13081319)
Supplement: Supplementary file 1 [file animals-13-01319-s001.zip]

Archive with 4 entries (4 files):
- Supplementary File S1_THI.pdf
- Supplementary File S2_Cowparitydistribution.pdf
- Supplementary File S3_Lameness.pdf
- Supplementary File S4-milk yield_BCS.pdf
